# Supplementary material
Source: HighWire-hosted journal article supplement (https://erj.ersjournals.com/content/55/2/1901157)
Supplement: inline-supplementary-material-1 [file inline-supplementary-material-1.pdf]

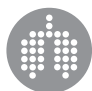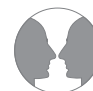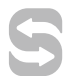

SHAREABLE PDF

# Cost-effectiveness of ambulatory oxygen in improving quality of life in fibrotic lung disease: preliminary evidence from the AmbOx Trial

Jennifer A. Whitty<sup>1,2</sup>, Jenny Rankin<sup>1</sup>, Dina Visca<sup>3,4,5</sup>, Vicky Tsipouri<sup>4,5</sup>, Letizia Mori<sup>4,5</sup>, Lisa Spencer<sup>6</sup>, Huzaifa Adamali<sup>7</sup>, Toby M. Maher<sup>5</sup>, Nicholas S. Hopkinson<sup>5</sup>, Surinder S. Birring<sup>8</sup>, Morag Farquhar<sup>9</sup>, Athol U. Wells<sup>4,5</sup>, Piersante Sestini<sup>10</sup> and Elisabetta A. Renzoni<sup>4,5</sup>

**Affiliations:** <sup>1</sup>Norwich Medical School, University of East Anglia, Norwich, UK. <sup>2</sup>Collaboration for Leadership in Applied Health Research and Care (CLAHRC), East of England, UK. <sup>3</sup>Division of Pulmonary Rehabilitation, Istituti Clinici Scientifici Maugeri, IRCCS, Tradate, Italy. <sup>4</sup>Interstitial Lung Disease Unit, Royal Brompton Hospital, London, UK. <sup>5</sup>National Heart and Lung Institute, Imperial College London, London, UK. <sup>6</sup>Liverpool Interstitial Lung Disease Service, Aintree Chest Centre, University Hospital Aintree, Liverpool, UK. <sup>7</sup>Bristol Interstitial Lung Disease (BILD) Service, Southmead Hospital, Bristol, UK. <sup>8</sup>Centre for Human and Applied Physiological Sciences, School of Basic and Medical Biosciences, Faculty of Life Sciences and Medicine, King's College London, London, UK. <sup>9</sup>School of Health Sciences, University of East Anglia, Norwich, UK. <sup>10</sup>Dept of Respiratory Medicine, Surgery and Neurosciences, University of Siena, Siena, Italy.

**Correspondence:** Jennifer A. Whitty, Health Economics Group, Norwich Medical School, University of East Anglia, Norwich Research Park, Norwich, NR4 7JT, UK. E-mail: [jennifer.whitty@uea.ac.uk](mailto:jennifer.whitty@uea.ac.uk)

 @ERSpublications

Ambulatory oxygen may be cost-effective in improving quality of life in fibrotic lung disease. To be more conclusive, we need to understand societal willingness to pay for quality of life improvements and whether improvements are sustained. <http://bit.ly/2pAiBji>

**Cite this article as:** Whitty JA, Rankin J, Visca D, *et al.* Cost-effectiveness of ambulatory oxygen in improving quality of life in fibrotic lung disease: preliminary evidence from the AmbOx Trial. *Eur Respir J* 2020; 55: 1901157 [<https://doi.org/10.1183/13993003.01157-2019>].

This single-page version can be shared freely online.

## To the Editor:

Fibrotic interstitial lung diseases (ILDs) are chronic and often progressive conditions resulting in substantial impact on morbidity, health-related quality of life (HRQoL), and health system costs. Ambulatory oxygen (AO) used during routine daily activities could lead to improved exercise performance, reduced symptoms and improved mobility in daily life. A UK prospective, multicentre, mixed method, randomised controlled crossover trial in patients with fibrotic ILD (AmbOx trial: NCT02286063), the first study on AO effects in daily life, reported improved HRQoL after 2 weeks of AO compared to no intervention, when measured by the King's Brief ILD (K-BILD) questionnaire [1–3]. Although AO is used in ILD, evidence supporting its health-economic impact is absent. Here, we evaluate the cost-effectiveness of AO in patients with ILD, using data collected alongside the AmbOx Trial.
